# Supplementary material for: Change in Liver Fibrosis Associates with Progress of Diabetic Nephropathy in Patients with Nonalcoholic Fatty Liver Disease
Source: MDPI journal article supplement (doi:10.3390/nu15143248), 2023-07-22
Supplement: s1 [file s1]

**Table S1.** Baseline characteristics of the patients according to FIB-4 index.

|                                      | FIB-4 Index              |                                       |                           |
|--------------------------------------|--------------------------|---------------------------------------|---------------------------|
|                                      | Low Risk Group<br>n = 37 | Indeterminate Risk<br>Group<br>n = 95 | High Risk Group<br>n = 57 |
| Age, years                           | 58 (42–74)               | 67 (61–73)                            | 68 (61–75)                |
| Female, n (%)                        | 32 (32)                  | 26 (35.6)                             | 3 (18.8)                  |
| Body weight, kg                      | 69.2 (54.8–83.6)         | 64.5 (50.4–78.6)                      | 66.6 (52–81.2)            |
| BMI, kg/m <sup>2</sup>               | 25.9 (21.4–30.4)         | 25.5 (21.3–29.8)                      | 25.8 (22.3–29.3)          |
| Systolic blood pressure, mmHg        | 134 (118–150)            | 136 (115–157)                         | 130 (107–154)             |
| Diastolic blood pressure, mmHg       | 80 (67–93)               | 74 (58–90)                            | 71 (60–83)                |
| Hypertension, n (%)                  | 58 (58)                  | 46 (63)                               | 10 (62.5)                 |
| Dyslipidemia, n (%)                  | 28 (28)                  | 29 (39.7)                             | 3 (18.8)                  |
| HbA1c, %                             | 7.6 (6.9–8.3) *          | 7.2 (6.7–7.7)                         | 6.8 (6.2–7.4)             |
| Creatinine, mg/dL                    | 0.9 (0.59–1.21)          | 0.92 (0.59–1.25) *                    | 0.86 (0.5–1.23)           |
| eGFR, mL/min/1.73 m <sup>2</sup>     | 65 (37.3–92.8)           | 56 (34.5–77.5) *                      | 66 (41.5–90.5)            |
| U-Alb/U-Cre, mg/g                    | 83.5 (61.5–187.3)        | 97.5 (64–39.2)                        | 123.1 (78–350.4)          |
| U-Pro/U-Cre, mg/g                    | 1.4 (1.2–3.7)            | 1.3 (1.1–2.5)                         | 0.75 (0.7–2.2)            |
| DN stage, stage 2/stage 3 (%)        | 68/32, (68/32)           | 49/24 (67.1/32.9)                     | 10/6 (62.5/37.5)          |
| Estimated salt intake, g/day         | 10.6 (7.1–14.2)          | 10.6 (8–13.2)                         | 11.7 (9.7–13.7)           |
| AST, U/L                             | 19 (12–28) *             | 21 (13–29)                            | 27.5 (4–52)               |
| ALT, U/L                             | 24 (8–44)                | 19 (11–31)                            | 22 (18–61)                |
| Platelet count, ×10 <sup>3</sup> /μL | 24.9 (18.9–30.8) *       | 19.7 (14.9–24.5)                      | 13.8 (10.1–17.4)          |
| FIB-4 index                          | 0.99 (0.86–1.19) **†     | 1.68 (1.42–2.14) *                    | 2.76 (2.26–3.66)          |
| SGLT2 inhibitor, n (%)               | 0 (0)                    | 0 (0)                                 | 0 (0)                     |
| GLP-1 agonist, n (%)                 | 8 (8)                    | 6 (8.2)                               | 2 (12.5)                  |
| DPP-4 inhibitor, n (%)               | 48 (48)                  | 39 (53.4)                             | 9 (56.3)                  |
| Pioglitazone, n (%)                  | 7 (7)                    | 5 (6.8)                               | 0 (0)                     |
| Insulin injection, n (%)             | 48 (48)                  | 27 (37)                               | 6 (37.5)                  |

FIB-4 index <1.3 was a low risk, 1.3–2.66 was an indeterminate risk, and ≥2.67 was a high risk. The U-Alb/U-Cre ratio was measured in patients with DN stage 2. The U-Pro/U-Cre ratio was measured in patients with DN stage 3. The Dunn–Bonferroni test was used for the comparison of continuous variables between the groups. Fisher’s exact test with the Bonferroni correction was used for the comparison of categorical variables between the groups. **Abbreviations:** BMI—body mass index; HbA1c—hemoglobin A1c; eGFR—estimated glomerular filtration rate; U-Alb/U-Cre—urine albumin to urine creatinine ratio; U-Pro/U-Cre—urine protein to urine creatine ratio; DN—diabetic nephropathy; AST—aspartate aminotransferase; ALT—alanine aminotransferase; FIB-4—fibrosis 4; SGLT2—sodium glucose cotransporter 2; GLP-1—glucagon-like peptide-1; DPP4—dipeptidyl peptidase 4. \*  $p < 0.05$  and \*\*  $p < 0.001$ , compared with the high risk group; †  $p < 0.05$  and ††  $p < 0.001$ , compared with the indeterminate risk group.

**Table S2.** Regression analysis of baseline characteristics for changes in FIB-4 index.

| Explanatory Variable     | Partial Regression Coefficient | <i>t</i> Value | <i>p</i> Value | 95% C.I      |
|--------------------------|--------------------------------|----------------|----------------|--------------|
| Univariate               |                                |                |                |              |
| Gender                   | 0.033                          | 0.444          | 0.675          | -0.137–0.216 |
| Age                      | -0.037                         | -0.487         | 0.627          | -0.012–0.007 |
| BMI                      | -0.053                         | -0.703         | 0.483          | -0.027–0.013 |
| Systolic blood pressure  | -0.172                         | -2.312         | 0.022          | -0.013–0.001 |
| Diastolic blood pressure | -0.091                         | -1.215         | 0.226          | -0.013–0.003 |
| Hypertension             | 0.063                          | 0.84           | 0.402          | -0.098–0.243 |
| Dyslipidemia             | -0.052                         | -0.688         | 0.492          | -0.242–0.117 |
| HbA1c                    | -0.112                         | -1.482         | 0.140          | -0.131–0.019 |
| eGFR                     | -0.078                         | -1.033         | 0.303          | -0.007–0.002 |
| DN category              | -0.154                         | -2.071         | 0.040          | -0.361–0.009 |
| Estimated salt intake    | -0.113                         | -1.44          | 0.152          | -0.064–0.01  |
| Multivariate             |                                |                |                |              |
| Systolic blood pressure  | -0.155                         | -2.077         | 0.0392         | -0.012–0.001 |
| DN category              | -0.135                         | -1.809         | 0.0721         | -0.337–0.015 |

A simple regression model analysis and multiple regression model analysis.  
**Abbreviations:** BMI—body mass index; HbA1c—hemoglobin A1c; eGFR—estimated glomerular filtration rate; DN—diabetic nephropathy; AST—aspartate aminotransferase; ALT—alanine aminotransferase; FIB-4—fibrosis 4.

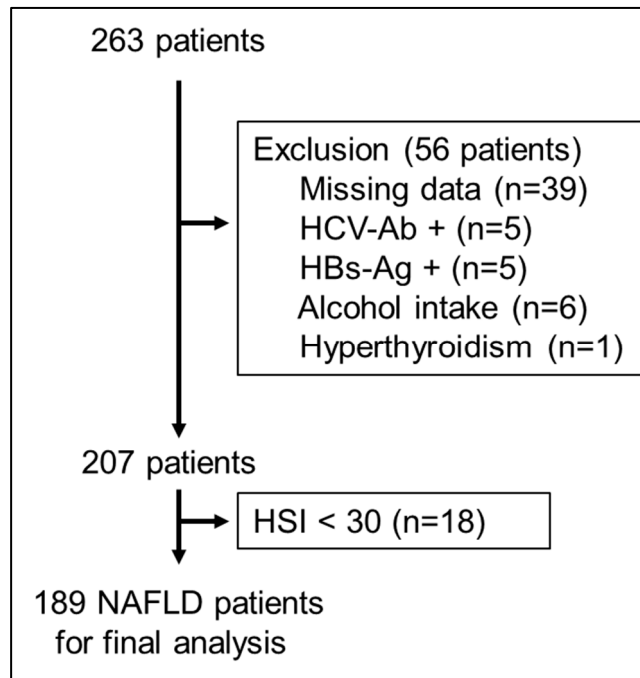

**Figure S1.** Patient flow of the study. A total of 56 patients were excluded from analysis due to missing data and possible etiology which affects liver function. Information about alcohol intake was based on interviews by the physician and nurse in charge. **Abbreviations:** HCV-Ab—hepatitis C virus antibody, mass index; HBs-Ag—hepatitis B surface antigen; HSI—hepatic steatosis index; NAFLD—nonalcoholic fatty liver disease.
